# Supplementary material for: Substituent effect of R-isophthalates (R = –H, –CH3, –OCH3, –tBu, –OH, and –NO2) on the construction of CdIIcoordination polymers incorporating a dipyridyl tecton 2,5-bis(3-pyridyl)-1,3,4-oxadiazole
Source: Royal Society of Chemistry journal article supplement (doi:10.1039/c0ce00555j), 2010-12-15
Supplement: c0ce00555j.pdf [file c0ce00555j.pdf]

*Electronic Supplementary Information (ESI)*

**Substituent effect of *R*-isophthalates (*R* = –H, –CH<sub>3</sub>, –OCH<sub>3</sub>, –*t*Bu, –OH, and –NO<sub>2</sub>) on the construction of Cd<sup>II</sup> coordination polymers incorporating a dipyridyl tecton 2,5-bis(3-pyridyl)-1,3,4-oxadiazole**

Jing Chen, Cheng-Peng Li and Miao Du\*

*College of Chemistry, Tianjin Key Laboratory of Structure and Performance for Functional Molecule, Tianjin Normal University, Tianjin 300387, P. R. China*

\* To whom correspondence should be addressed. E-mail: dumiao@public.tpt.tj.cn.

***CrystEngComm***

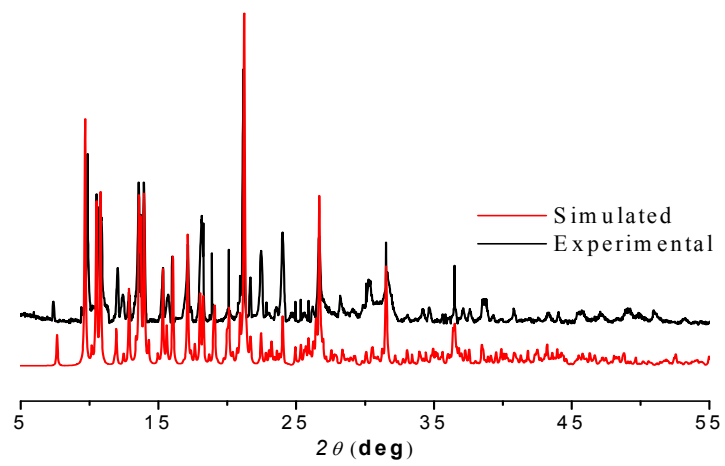

(a)

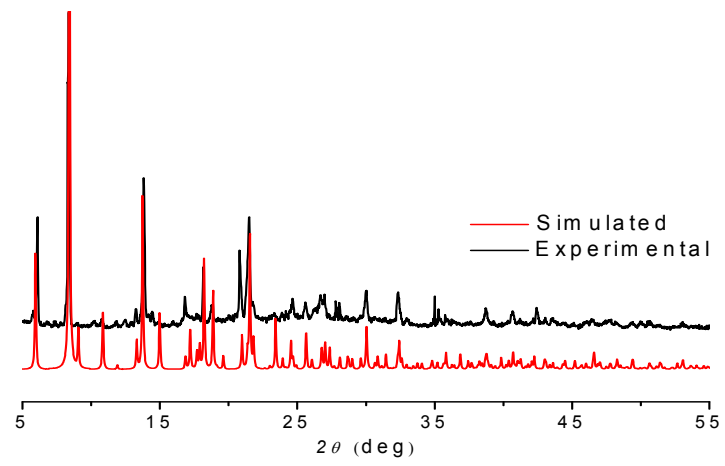

(b)

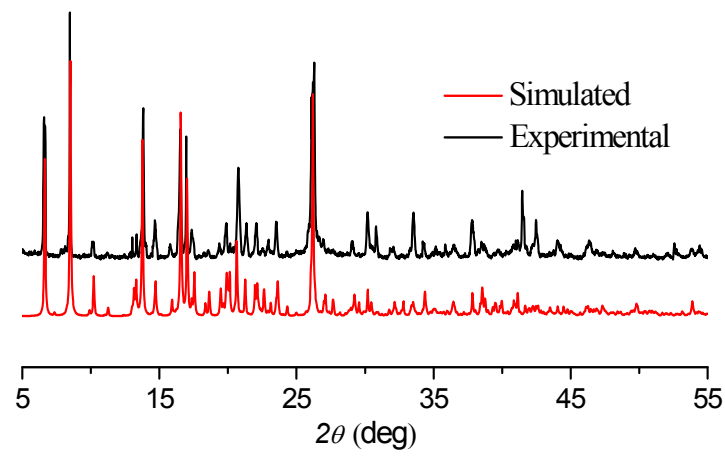

(c)

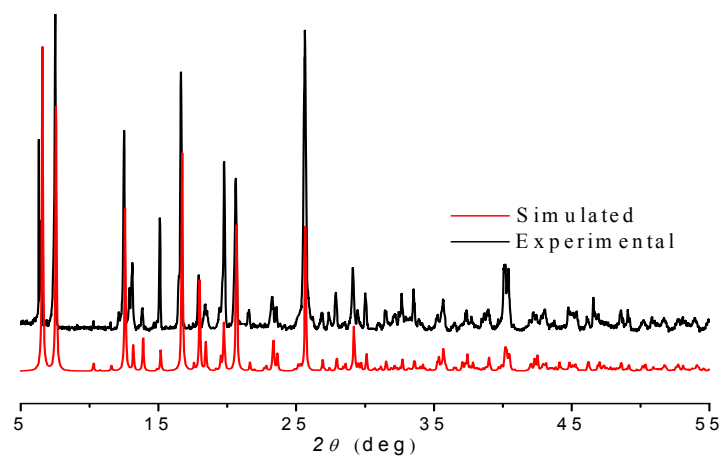

(d)

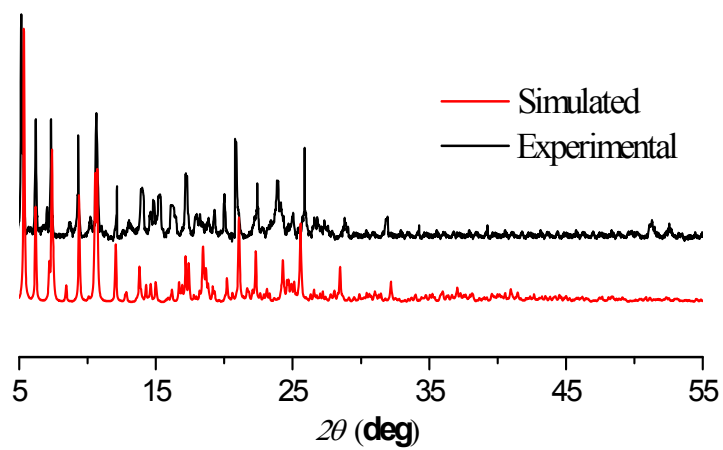

(e)

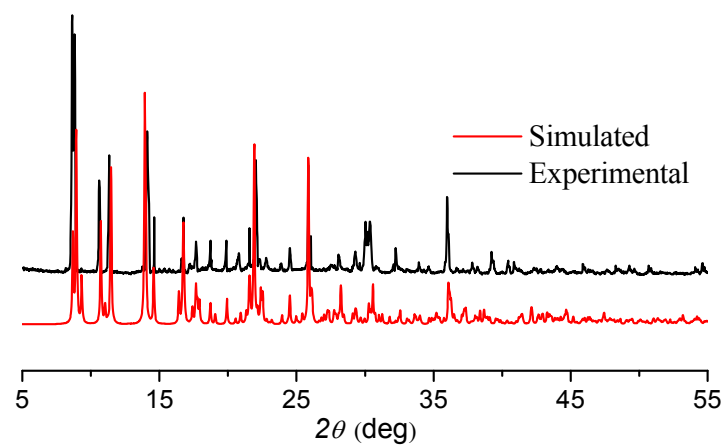

(f)

**Fig. S1** Powder X-ray diffraction (PXRD) patterns for complexes 1–6 (a–f).

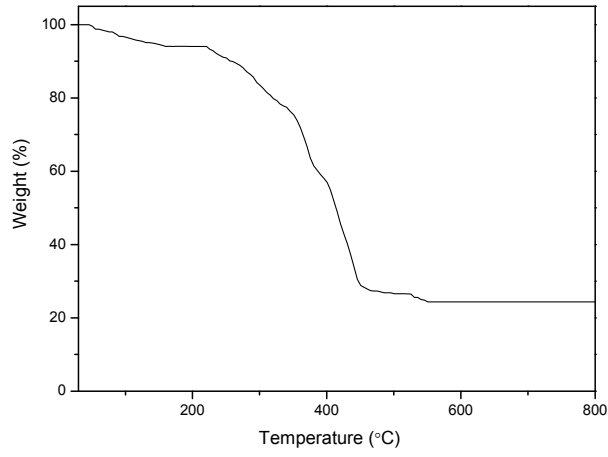

**(a)**

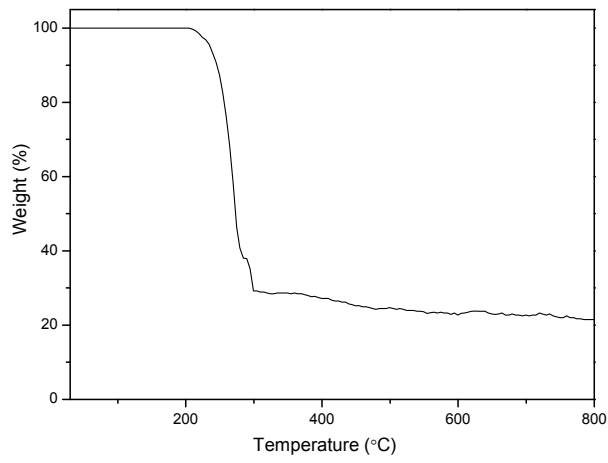

**(b)**

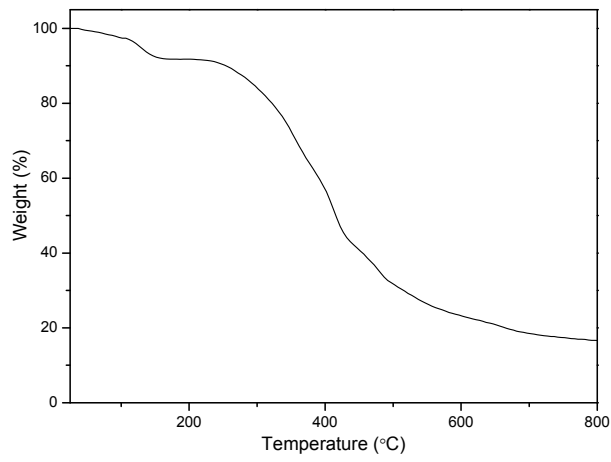

**(c)**

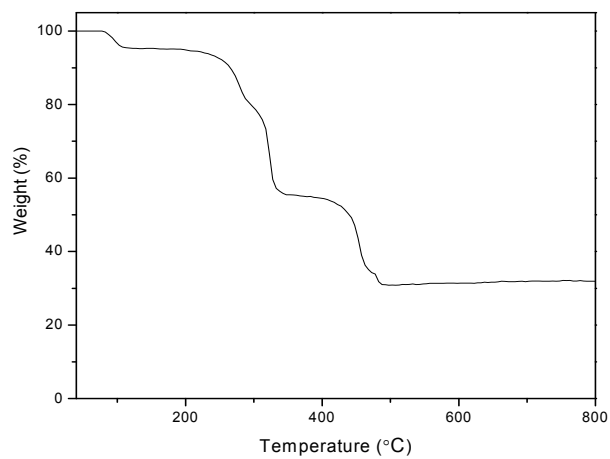

(d)

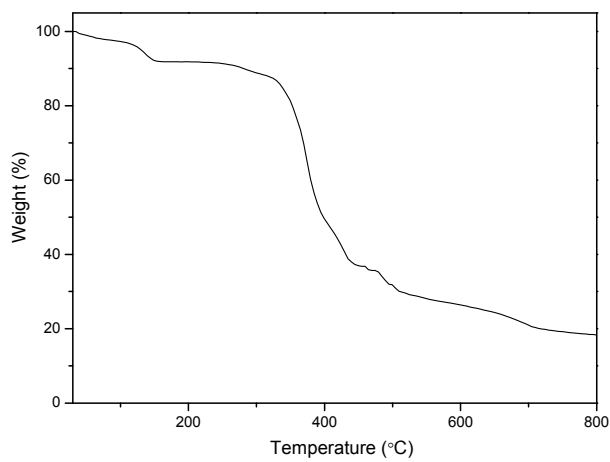

(e)

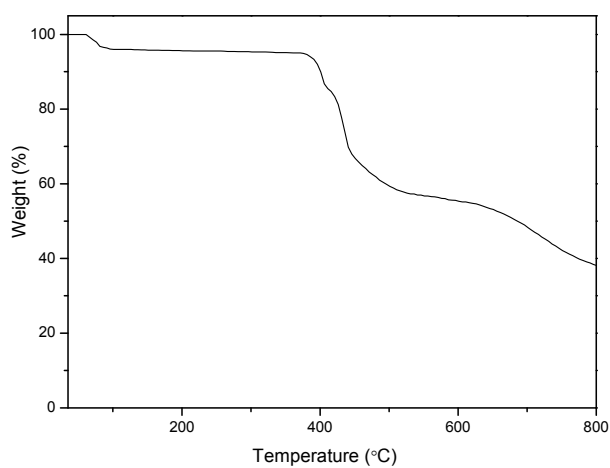

(f)

**Fig. S2** TGA curves for complexes 1–6 (a–f).

**Table S1** Selective bond lengths (Å) and angles (°) for complexes **1–6**

---

| <b>1</b>     |          |              |          |
|--------------|----------|--------------|----------|
| Cd1–O3       | 2.170(3) | Cd1–N1       | 2.335(3) |
| Cd1–O11      | 2.338(3) | Cd1–O5A      | 2.378(3) |
| Cd1–O6A      | 2.397(3) | Cd1–N5       | 2.408(3) |
| Cd2–O12      | 2.298(3) | Cd2–O10A     | 2.305(3) |
| Cd2–O7       | 2.322(3) | Cd2–N8       | 2.355(3) |
| Cd2–N4       | 2.383(3) | Cd2–O9A      | 2.545(3) |
| Cd2–O8       | 2.682(4) |              |          |
|              |          |              |          |
| O3–Cd1–N1    | 103.1(1) | O3–Cd1–O11   | 123.3(1) |
| N1–Cd1–O11   | 90.6(1)  | O3–Cd1–O5A   | 146.2(1) |
| N1–Cd1–O5A   | 82.9(1)  | O11–Cd1–O5A  | 89.5(1)  |
| O3–Cd1–O6A   | 91.7(1)  | N1–Cd1–O6A   | 91.2(1)  |
| O11–Cd1–O6A  | 143.5(1) | O5A–Cd1–O6A  | 54.67(9) |
| O3–Cd1–N5    | 90.5(1)  | N1–Cd1–N5    | 166.2(1) |
| O11–Cd1–N5   | 83.9(1)  | O5A–Cd1–N5   | 84.4(1)  |
| O6A–Cd1–N5   | 85.9(1)  | O12–Cd2–O10A | 139.8(1) |
| O12–Cd2–O7   | 131.6(1) | O10A–Cd2–O7  | 87.7(1)  |
| O12–Cd2–N8   | 91.3(1)  | O10A–Cd2–N8  | 100.1(1) |
| O7–Cd2–N8    | 87.6(1)  | O12–Cd2–N4   | 84.0(1)  |
| O10A–Cd2–N4  | 90.2(1)  | O7–Cd2–N4    | 87.7(1)  |
| N8–Cd2–N4    | 168.5(1) | O12–Cd2–O9A  | 89.3(1)  |
| O10A–Cd2–O9A | 53.5(1)  | O7–Cd2–O9A   | 138.9(1) |
| N8–Cd2–O9A   | 86.8(1)  | N4–Cd2–O9A   | 103.6(1) |
| O8–Cd2–O12   | 81.2(1)  | O8–Cd2–O10A  | 138.5(1) |
| O8–Cd2–O7    | 50.9(1)  | O8–Cd2–N8    | 80.2(1)  |
| O8–Cd2–N4    | 88.7(1)  | O8–Cd2–O9A   | 163.7(1) |

## 2

|             |          |             |          |
|-------------|----------|-------------|----------|
| Cd1-O4A     | 2.229(4) | Cd1-O5B     | 2.263(5) |
| Cd1-N4B     | 2.322(6) | Cd1-O3      | 2.371(5) |
| Cd1-N1      | 2.377(6) | Cd1-O2      | 2.403(4) |
| O4A-Cd1-O5B | 125.8(2) | O4A-Cd1-N4B | 96.8(2)  |
| O5B-Cd1-N4B | 86.4(2)  | O4A-Cd1-O3  | 88.8(2)  |
| O5B-Cd1-O3  | 145.4(2) | N4B-Cd1-O3  | 91.3(2)  |
| O4A-Cd1-N1  | 90.0(2)  | O5B-Cd1-N1  | 86.6(2)  |
| N4B-Cd1-N1  | 172.3(2) | O3-Cd1-N1   | 92.5(2)  |
| O4A-Cd1-O2  | 143.1(2) | O5B-Cd1-O2  | 90.8(2)  |
| N4B-Cd1-O2  | 88.4(2)  | O3-Cd1-O2   | 54.5(2)  |
| N1-Cd1-O2   | 88.5(2)  |             |          |

## 3

|          |          |          |          |
|----------|----------|----------|----------|
| Cd1-O2   | 2.234(4) | Cd1-O3A  | 2.251(4) |
| Cd1-O26  | 2.328(4) | Cd1-N1   | 2.346(5) |
| Cd1-O25  | 2.354(4) | Cd1-O4A  | 2.569(4) |
| Cd1-O1   | 2.655(5) | Cd2-O7   | 2.213(4) |
| Cd2-O9B  | 2.273(4) | Cd2-N4   | 2.324(5) |
| Cd2-O27  | 2.369(4) | Cd2-O31  | 2.451(4) |
| Cd2-O8B  | 2.479(4) | Cd2-O6   | 2.705(4) |
| Cd3-O19C | 2.269(4) | Cd3-O12  | 2.283(4) |
| Cd3-O28  | 2.309(4) | Cd3-O29  | 2.334(4) |
| Cd3-N7   | 2.366(5) | Cd3-O20C | 2.524(4) |
| Cd3-O13  | 2.548(4) | Cd4-O18  | 2.259(3) |
| Cd4-O14  | 2.308(4) | Cd4-O30  | 2.324(4) |
| Cd4-N9   | 2.331(4) | Cd4-N5   | 2.342(5) |
| Cd4-O15  | 2.543(4) | Cd4-O17  | 2.665(5) |

|               |          |              |          |
|---------------|----------|--------------|----------|
| O2–Cd1–O3A    | 141.0(2) | O2–Cd1–O26   | 85.8(2)  |
| O3A–Cd1–O26   | 94.1(2)  | O2–Cd1–N1    | 136.1(2) |
| O3A–Cd1–N1    | 82.9(2)  | O26–Cd1–N1   | 92.2(2)  |
| O2–Cd1–O25    | 90.6(2)  | O3A–Cd1–O25  | 91.9(2)  |
| O26–Cd1–O25   | 173.8(2) | N1–Cd1–O25   | 86.9(2)  |
| O2–Cd1–O4A    | 88.1(1)  | O3A–Cd1–O4A  | 53.0(2)  |
| O26–Cd1–O4A   | 94.6(2)  | N1–Cd1–O4A   | 135.7(2) |
| O25–Cd1–O4A   | 90.4(1)  | O1–Cd1–O2    | 52.3(2)  |
| O1–Cd1–O3A    | 166.5(2) | O1–Cd1–O26   | 84.0(1)  |
| O1–Cd1–N1     | 84.0(2)  | O1–Cd1–O25   | 89.9(1)  |
| O1–Cd1–O4A    | 140.4(1) | O7–Cd2–O9B   | 87.1(2)  |
| O7–Cd2–N4     | 137.2(2) | O9B–Cd2–N4   | 135.7(2) |
| O7–Cd2–O27    | 87.8(2)  | O9B–Cd2–O27  | 90.0(2)  |
| N4–Cd2–O27    | 92.5(2)  | O7–Cd2–O31   | 85.8(2)  |
| O9B–Cd2–O31   | 106.2(2) | N4–Cd2–O31   | 81.2(2)  |
| O27–Cd2–O31   | 162.3(1) | O7–Cd2–O8B   | 140.9(2) |
| O9B–Cd2–O8B   | 53.8(2)  | N4–Cd2–O8B   | 81.9(2)  |
| O27–Cd2–O8B   | 92.2(2)  | O31–Cd2–O8B  | 103.2(2) |
| O6–Cd2–O7     | 51.8(2)  | O6–Cd2–O9B   | 138.6(2) |
| O6–Cd2–N4     | 85.8(2)  | O6–Cd2–O27   | 85.1(2)  |
| O6–Cd2–O31    | 78.1(1)  | O6–Cd2–O8B   | 167.2(1) |
| O19C–Cd3–O12  | 135.0(2) | O19C–Cd3–O28 | 92.5(2)  |
| O12–Cd3–O28   | 86.8(2)  | O19C–Cd3–O29 | 95.5(2)  |
| O12–Cd3–O29   | 87.7(2)  | O28–Cd3–O29  | 172.0(2) |
| O19C–Cd3–N7   | 85.2(2)  | O12–Cd3–N7   | 139.9(2) |
| O28–Cd3–N7    | 91.4(2)  | O29–Cd3–N7   | 89.1(2)  |
| O19C–Cd3–O20C | 53.6(1)  | O12–Cd3–O20C | 81.3(1)  |
| O28–Cd3–O20C  | 90.7(1)  | O29–Cd3–O20C | 94.2(1)  |
| N7–Cd3–O20C   | 138.8(2) | O19C–Cd3–O13 | 169.8(1) |
| O12–Cd3–O13   | 53.8(1)  | O28–Cd3–O13  | 82.2(1)  |
| O29–Cd3–O13   | 89.9(1)  | N7–Cd3–O13   | 86.2(2)  |



|              |          |             |          |
|--------------|----------|-------------|----------|
| O20C–Cd3–O13 | 134.8(1) | O18–Cd4–O14 | 139.0(2) |
| O18–Cd4–O30  | 89.3(2)  | O14–Cd4–O30 | 90.0(2)  |
| O18–Cd4–N9   | 85.0(2)  | O14–Cd4–N9  | 92.5(2)  |
| O30–Cd4–N9   | 173.6(2) | O18–Cd4–N5  | 137.2(2) |
| O14–Cd4–N5   | 83.9(2)  | O30–Cd4–N5  | 91.8(2)  |
| N9–Cd4–N5    | 94.4(2)  | O18–Cd4–O15 | 86.2(1)  |
| O14–Cd4–O15  | 52.7(1)  | O30–Cd4–O15 | 87.5(1)  |
| N9–Cd4–O15   | 89.3(1)  | N5–Cd4–O15  | 136.6(2) |
| O17–Cd4–O18  | 52.0(1)  | O17–Cd4–O14 | 168.8(2) |
| O17–Cd4–O30  | 92.6(1)  | O17–Cd4–N9  | 86.0(1)  |
| O17–Cd4–N5   | 85.0(2)  | O17–Cd4–O15 | 138.2(1) |

4

|            |           |             |           |
|------------|-----------|-------------|-----------|
| Cd1–O5A    | 2.199(2)  | Cd1–N1      | 2.312(2)  |
| Cd1–O3     | 2.353(2)  | Cd1–O6      | 2.354(2)  |
| Cd1–O2     | 2.382(2)  | Cd1–O7      | 2.385(3)  |
| Cd1–O4A    | 2.779(3)  |             |           |
| O5A–Cd1–N1 | 138.80(9) | O5A–Cd1–O3  | 81.14(9)  |
| N1–Cd1–O3  | 140.03(9) | O5A–Cd1–O6  | 91.7(1)   |
| N1–Cd1–O6  | 85.21(9)  | O3–Cd1–O6   | 97.2(1)   |
| O5A–Cd1–O2 | 135.19(9) | N1–Cd1–O2   | 85.59(9)  |
| O3–Cd1–O2  | 54.59(8)  | O6–Cd1–O2   | 99.68(9)  |
| O5A–Cd1–O7 | 88.7(1)   | N1–Cd1–O7   | 81.6(1)   |
| O3–Cd1–O7  | 102.4(1)  | O6–Cd1–O7   | 160.3(1)  |
| O2–Cd1–O7  | 93.9(1)   | O4A–Cd1–O5A | 50.57(8)  |
| O4A–Cd1–N1 | 88.29(8)  | O4A–Cd1–O3  | 131.67(8) |
| O4A–Cd1–O6 | 84.12(8)  | O4A–Cd1–O2  | 172.49(8) |
| O4A–Cd1–O7 | 80.87(8)  |             |           |

|              |          |               |          |
|--------------|----------|---------------|----------|
| Cd1–O12A     | 2.289(5) | Cd1–O14       | 2.294(6) |
| Cd1–O4       | 2.320(5) | Cd1–N5        | 2.345(6) |
| Cd1–N1       | 2.378(7) | Cd1–O5        | 2.580(5) |
| Cd1–O11A     | 2.581(5) | Cd2–O7B       | 2.211(5) |
| Cd2–N8       | 2.306(6) | Cd2–O15       | 2.338(6) |
| Cd2–O9       | 2.381(5) | Cd2–O10       | 2.382(5) |
| Cd2–N9       | 2.427(8) | Cd2–O8B       | 2.741(6) |
| O12A–Cd1–O14 | 93.8(2)  | O12A–Cd1–O4   | 81.2(2)  |
| O14–Cd1–O4   | 87.0(2)  | O12A–Cd1–N5   | 140.8(2) |
| O14–Cd1–N5   | 87.8(2)  | O4–Cd1–N5     | 138.0(2) |
| O12A–Cd1–N1  | 90.3(2)  | O14–Cd1–N1    | 173.3(2) |
| O4–Cd1–N1    | 98.9(2)  | N5–Cd1–N1     | 85.7(2)  |
| O12A–Cd1–O5  | 133.5(2) | O14–Cd1–O5    | 86.8(2)  |
| O4–Cd1–O5    | 52.4(2)  | N5–Cd1–O5     | 85.7(2)  |
| N1–Cd1–O5    | 94.3(2)  | O12A–Cd1–O11A | 53.2(2)  |
| O14–Cd1–O11A | 90.5(2)  | O4–Cd1–O11A   | 134.1(2) |
| N5–Cd1–O11A  | 87.6(2)  | N1–Cd1–O11A   | 87.7(2)  |
| O5–Cd1–O11A  | 172.9(2) | O7B–Cd2–N8    | 135.9(2) |
| O7B–Cd2–O15  | 83.9(2)  | N8–Cd2–O15    | 80.6(2)  |
| O7B–Cd2–O9   | 137.1(2) | N8–Cd2–O9     | 86.5(2)  |
| O15–Cd2–O9   | 100.1(2) | O7B–Cd2–O10   | 82.4(2)  |
| N8–Cd2–O10   | 140.3(2) | O15–Cd2–O10   | 96.7(2)  |
| O9–Cd2–O10   | 54.7(2)  | O7B–Cd2–N9    | 96.4(2)  |
| N8–Cd2–N9    | 93.4(2)  | O15–Cd2–N9    | 171.3(2) |
| O9–Cd2–N9    | 85.6(2)  | O10–Cd2–N9    | 92.0(2)  |
| O8B–Cd2–O7B  | 51.4(2)  | O8B–Cd2–N8    | 88.4(2)  |
| O8B–Cd2–O15  | 93.1(2)  | O8B–Cd2–O9    | 164.9(2) |
| O8B–Cd2–O10  | 131.3(2) | O8B–Cd2–N9    | 80.5(2)  |

## 6

|             |           |             |           |
|-------------|-----------|-------------|-----------|
| Cd1–O2      | 2.222(2)  | Cd1–O3A     | 2.274(2)  |
| Cd1–N1      | 2.348(3)  | Cd1–N4B     | 2.353(3)  |
| Cd1–O4C     | 2.369(2)  | Cd1–O5C     | 2.395(2)  |
| Cd1–O3      | 2.868(4)  |             |           |
| O2–Cd1–O3A  | 127.98(9) | O2–Cd1–N1   | 92.9(1)   |
| O3A–Cd1–N1  | 89.5(1)   | O2–Cd1–N4B  | 93.7(1)   |
| O3A–Cd1–N4B | 84.8(1)   | N1–Cd1–N4B  | 173.06(9) |
| O2–Cd1–O4C  | 143.34(9) | O3A–Cd1–O4C | 88.64(9)  |
| N1–Cd1–O4C  | 88.67(9)  | N4B–Cd1–O4C | 87.36(9)  |
| O2–Cd1–O5C  | 88.41(9)  | O3A–Cd1–O5C | 143.55(9) |
| N1–Cd1–O5C  | 90.8(1)   | N4B–Cd1–O5C | 91.6(1)   |
| O4C–Cd1–O5C | 54.93(8)  | O3–Cd1–O2   | 48.50(9)  |
| O3–Cd1–O3A  | 79.5(1)   | O3–Cd1–N1   | 95.4(1)   |
| O3–Cd1–N4B  | 87.3(1)   | O3–Cd1–O4C  | 167.40(9) |
| O3–Cd1–O5C  | 136.66(9) |             |           |

---

Symmetry codes: A =  $x - 1, y, z$  for **1**; A =  $x, y, z + 1$ ; B =  $-x + 1/2, -y + 3/2, -z + 3/2$  for **2**; A =  $-x - 1/2, y + 1/2, -z + 1$ ; B =  $-x + 1/2, y + 1/2, -z$ ; C =  $x, y - 1, z$  for **3**; A =  $-x + 1/2, y - 1/2, -z + 3/2$  for **4**; A =  $x, y - 1, z$ ; B =  $x, y + 1, z + 1$  for **5**; A =  $-x + 1, -y + 1, -z + 1$ ; B =  $-x + 2, -y + 1, -z + 1$ ; C =  $x + 1, y, z$  for **6**.

**Table S2** Important hydrogen-bonding geometries (Å, °) for complexes **1**, **3**, **4**, and **5**

| D–H...A        | D...A    | H...A | D–H...A | Symmetry code                |
|----------------|----------|-------|---------|------------------------------|
| <b>1</b>       |          |       |         |                              |
| O11–H11A...N3  | 2.983(5) | 2.14  | 172     | $-x + 1, -y, -z + 1$         |
| O11–H11B...N6  | 2.951(5) | 2.17  | 153     | $-x + 1, -y + 1, -z$         |
| O12–H12A...O4  | 2.938(4) | 2.26  | 136     | $x - 1, y, z$                |
| O12–H12B...O14 | 2.690(8) | 2.03  | 133     |                              |
| <b>3</b>       |          |       |         |                              |
| O25–H25A...N8  | 2.967(6) | 2.13  | 167     | $-x, y, -z + 1$              |
| O25–H25B...O13 | 2.770(5) | 1.96  | 159     | $-x, y, -z + 1$              |
| O26–H26A...O33 | 2.695(6) | 1.97  | 143     | $x - 1/2, y - 1/2, z$        |
| O27–H27A...O17 | 2.837(6) | 2.08  | 148     | $-x + 1/2, y - 1/2, -z$      |
| O27–H27B...N6  | 3.003(7) | 2.19  | 161     | $-x + 1/2, y - 1/2, -z$      |
| O28–H28A...O32 | 2.719(8) | 1.92  | 157     |                              |
| O28–H28B...O4  | 2.732(6) | 2.09  | 132     | $x + 1/2, y + 1/2, z$        |
| O29–H29A...O6  | 2.723(5) | 1.88  | 172     |                              |
| O29–H29B...N3  | 2.957(6) | 2.12  | 170     |                              |
| O30–H30A...O1  | 2.781(5) | 1.94  | 174     | $x + 1/2, y + 1/2, z$        |
| O30–H30B...N2  | 2.859(7) | 2.04  | 161     | $x + 1/2, y + 1/2, z$        |
| <b>4</b>       |          |       |         |                              |
| O6–H6A...O4    | 2.705(3) | 1.86  | 174     | $-x + 1/2, -y + 1/2, -z + 1$ |
| O6–H6B...N2    | 3.061(4) | 2.23  | 166     | $x, -y, z - 1/2$             |
| O7–H7A...O3    | 2.686(4) | 1.86  | 162     | $x, -y, z + 1/2$             |
| <b>5</b>       |          |       |         |                              |

|              |          |      |     |                          |
|--------------|----------|------|-----|--------------------------|
| O6–H6…O17    | 2.67(1)  | 1.85 | 174 | $-x + 1, -y + 1, -z$     |
| O13–H13…O20  | 2.71(1)  | 1.89 | 174 |                          |
| O14–H14A…O10 | 2.855(9) | 2.24 | 129 | $-x + 1, -y + 1, -z + 1$ |
| O15–H15A…O5  | 2.813(9) | 2.01 | 158 | $-x + 1, -y + 1, -z + 1$ |
| O15–H15B…O19 | 2.83(1)  | 2.13 | 139 | $-x + 1, -y + 1, -z + 1$ |
| O16–H16A…N6  | 2.870(9) | 2.03 | 170 | $-x + 1, -y, -z + 1$     |
| O16–H16B…O11 | 2.820(8) | 1.97 | 173 | $-x + 1, -y + 1, -z + 1$ |

---
